# Supplementary material for: Association of Physical Activity Intensity with All-Cause Mortality in Cancer Survivors: A National Prospective Cohort Study
Source: MDPI journal article supplement (doi:10.3390/cancers14235760), 2022-11-23
Supplement: s1 [file s1]

Supplementary materials

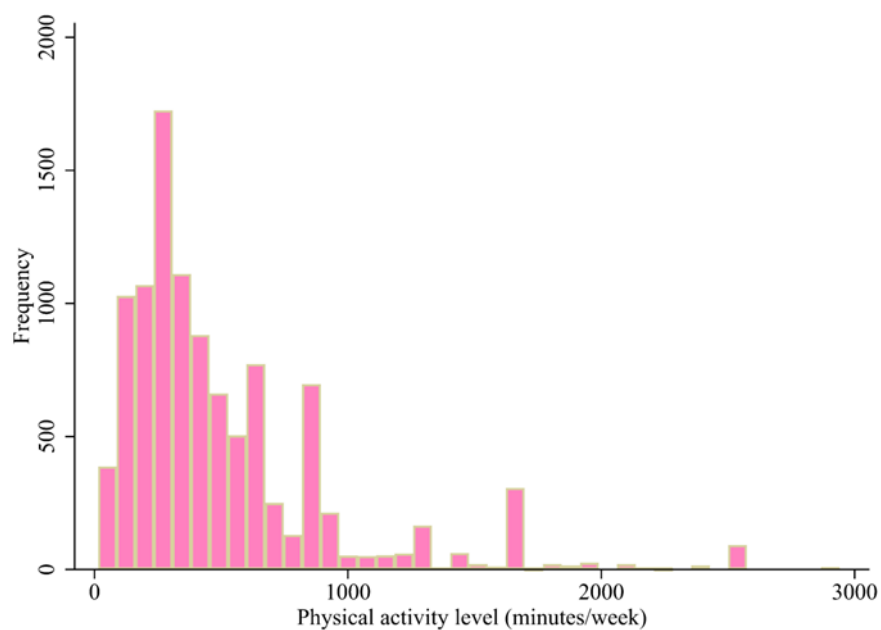

**Figure S1.** Distribution histogram of physical activity level (minutes/week).

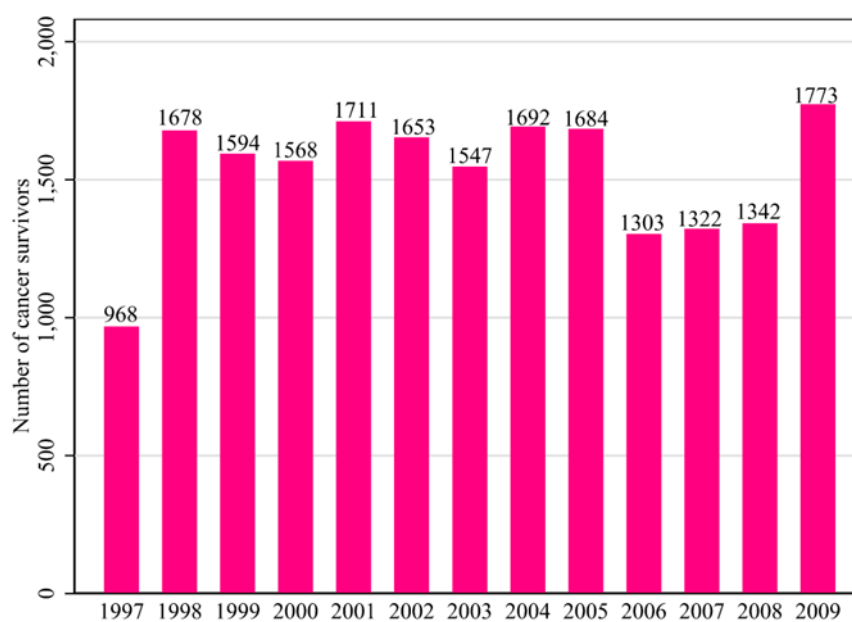

**Figure S2.** The number of cancer survivors in 13 survey cycles.

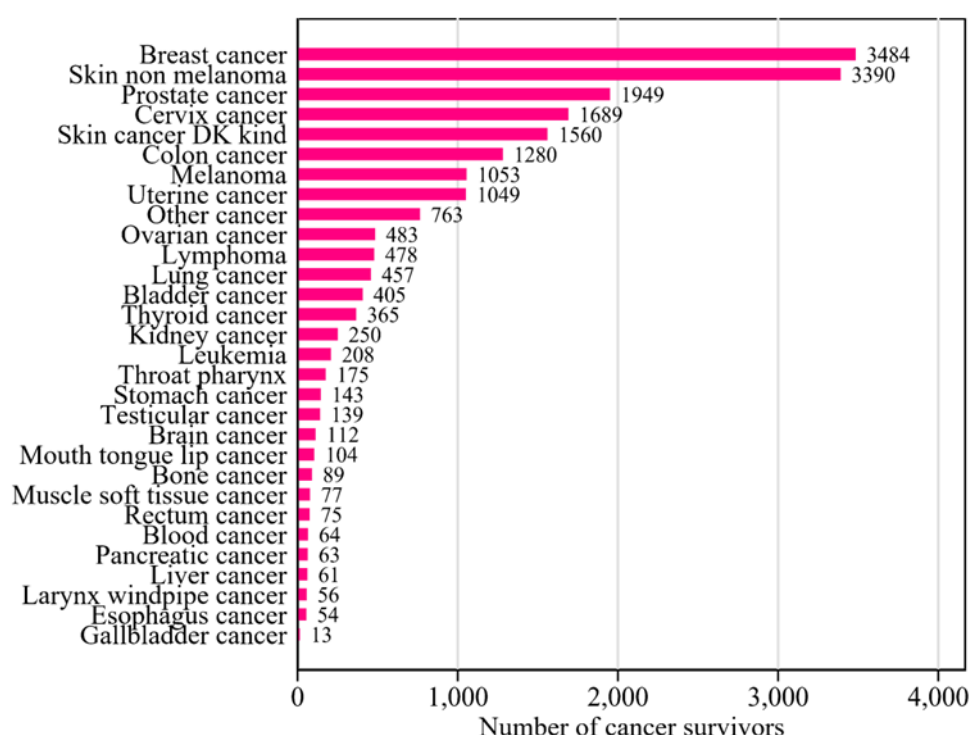

**Figure S3.** Detailed number of cancer survivors included in this study.

**Table S1.** Sensitivity analyses of the associations between physical activities and all-cause mortality among cancer survivors excluding those with skin cancer.

|                                         | Non-adjusted              | Adjust I                  | Adjust II                 |
|-----------------------------------------|---------------------------|---------------------------|---------------------------|
| <b>All-cause mortality</b>              |                           |                           |                           |
| PA(Continuous)                          | 0.92 (0.91, 0.93) <0.0001 | 0.95 (0.94, 0.96) <0.0001 | 0.95 (0.94, 0.96) <0.0001 |
| PA level                                |                           |                           |                           |
| 0                                       | 1(Reference)              | 1(Reference)              | 1(Reference)              |
| 10min-1h                                | 0.59 (0.52, 0.67) <0.0001 | 0.72 (0.63, 0.83) <0.0001 | 0.73 (0.63, 0.84) <0.0001 |
| 1-2.5h                                  | 0.61 (0.56, 0.66) <0.0001 | 0.69 (0.63, 0.76) <0.0001 | 0.71 (0.65, 0.78) <0.0001 |
| 2.5-5h                                  | 0.49 (0.45, 0.54) <0.0001 | 0.64 (0.57, 0.71) <0.0001 | 0.65 (0.58, 0.72) <0.0001 |
| 5-7.5h                                  | 0.43 (0.38, 0.48) <0.0001 | 0.59 (0.52, 0.68) <0.0001 | 0.61 (0.54, 0.70) <0.0001 |
| 7.5-13.3h                               | 0.39 (0.34, 0.45) <0.0001 | 0.55 (0.47, 0.65) <0.0001 | 0.57 (0.49, 0.67) <0.0001 |
| 13.3-24h                                | 0.41 (0.35, 0.49) <0.0001 | 0.53 (0.44, 0.63) <0.0001 | 0.56 (0.47, 0.67) <0.0001 |
| P for trend                             | <0.001                    | <0.001                    | <0.001                    |
| <b>Cancer mortality</b>                 |                           |                           |                           |
| PA(Continuous)                          | 0.92 (0.85, 1.00) 0.0472  | 0.92 (0.83, 1.01) 0.0708  | 0.91 (0.83, 1.00) 0.0595  |
| PA level                                |                           |                           |                           |
| 0                                       | 1(Reference)              | 1(Reference)              | 1(Reference)              |
| 10min-1h                                | 0.60 (0.19, 1.92) 0.3912  | 0.78 (0.24, 2.52) 0.6823  | 0.86 (0.27, 2.76) 0.7938  |
| 1-2.5h                                  | 0.32 (0.13, 0.79) 0.0141  | 0.35 (0.13, 0.98) 0.0465  | 0.37 (0.13, 1.04) 0.0589  |
| 2.5-5h                                  | 0.68 (0.32, 1.42) 0.3004  | 0.85 (0.38, 1.90) 0.6928  | 0.83 (0.37, 1.88) 0.6631  |
| 5-7.5h                                  | 0.25 (0.06, 1.03) 0.0543  | 0.35 (0.09, 1.47) 0.1522  | 0.36 (0.09, 1.52) 0.1661  |
| 7.5-13.3h                               | 0.49 (0.15, 1.56) 0.2275  | 0.52 (0.12, 2.17) 0.3698  | 0.54 (0.13, 2.26) 0.4017  |
| 13.3-24h                                | 0.51 (0.12, 2.08) 0.3467  | 0.31 (0.04, 2.27) 0.2494  | 0.26 (0.04, 1.95) 0.1921  |
| P for trend                             | 0.047                     | 0.071                     | 0.06                      |
| <b>Cardiovascular disease mortality</b> |                           |                           |                           |
| PA(Continuous)                          | 0.94 (0.90, 0.98) 0.0051  | 0.92 (0.88, 0.97) 0.0030  | 0.93 (0.89, 0.98) 0.0097  |
| PA level                                |                           |                           |                           |
| 0                                       | 1(Reference)              | 1(Reference)              | 1(Reference)              |
| 10min-1h                                | 1.22 (0.72, 2.08) 0.4577  | 1.37 (0.78, 2.38) 0.2713  | 1.42 (0.81, 2.49) 0.2180  |
| 1-2.5h                                  | 0.67 (0.44, 1.02) 0.0609  | 0.65 (0.41, 1.04) 0.0727  | 0.65 (0.40, 1.04) 0.0740  |
| 2.5-5h                                  | 0.80 (0.52, 1.24) 0.3219  | 0.75 (0.46, 1.23) 0.2573  | 0.67 (0.41, 1.11) 0.1194  |
| 5-7.5h                                  | 0.77 (0.45, 1.32) 0.3439  | 0.74 (0.41, 1.31) 0.2989  | 0.85 (0.47, 1.51) 0.5736  |
| 7.5-13.3h                               | 0.65 (0.34, 1.23) 0.1833  | 0.58 (0.27, 1.25) 0.1618  | 0.61 (0.28, 1.33) 0.2153  |

|             |                          |                          |                          |
|-------------|--------------------------|--------------------------|--------------------------|
| 13.3-24h    | 0.20 (0.05, 0.81) 0.0236 | 0.12 (0.02, 0.88) 0.0365 | 0.15 (0.02, 1.08) 0.0598 |
| P for trend | 0.005                    | 0.003                    | 0.01                     |

Non-adjusted model adjust for: None; Adjust I model adjust for: age, sex, BMI, race, marital status, smoking, alcohol drinking; Adjust II model adjust for: age, sex, BMI, race, marital status, smoking, alcohol drinking, hypertension, coronary heart disease, angina, myocardial infarction, stroke, diabetes, and asthma;.

**Table S2.** Sensitivity analyses by excluding those who died in the first 2 years of follow-up.

|                                         | Non-adjusted              | Adjust I                  | Adjust II                 |
|-----------------------------------------|---------------------------|---------------------------|---------------------------|
| <b>All-cause mortality</b>              |                           |                           |                           |
| PA(Continuous)                          | 0.93 (0.92, 0.94) <0.0001 | 0.96 (0.95, 0.97) <0.0001 | 0.96 (0.96, 0.97) <0.0001 |
| PA level                                |                           |                           |                           |
| 0                                       | 1(Reference)              | 1(Reference)              | 1(Reference)              |
| 10min-1h                                | 0.62 (0.55, 0.70) <0.0001 | 0.78 (0.68, 0.89) 0.0002  | 0.78 (0.68, 0.89) 0.0002  |
| 1-2.5h                                  | 0.63 (0.58, 0.68) <0.0001 | 0.75 (0.68, 0.81) <0.0001 | 0.76 (0.70, 0.83) <0.0001 |
| 2.5-5h                                  | 0.53 (0.49, 0.57) <0.0001 | 0.72 (0.65, 0.79) <0.0001 | 0.73 (0.66, 0.80) <0.0001 |
| 5-7.5h                                  | 0.48 (0.43, 0.53) <0.0001 | 0.69 (0.61, 0.77) <0.0001 | 0.70 (0.63, 0.79) <0.0001 |
| 7.5-13.3h                               | 0.39 (0.35, 0.44) <0.0001 | 0.58 (0.50, 0.66) <0.0001 | 0.60 (0.52, 0.69) <0.0001 |
| 13.3-24h                                | 0.43 (0.37, 0.49) <0.0001 | 0.59 (0.50, 0.69) <0.0001 | 0.62 (0.53, 0.73) <0.0001 |
| P for trend                             | <0.001                    | <0.001                    | <0.001                    |
| <b>Cancer mortality</b>                 |                           |                           |                           |
| PA(Continuous)                          | 0.91 (0.85, 0.98) 0.0119  | 0.91 (0.84, 0.99) 0.0297  | 0.92 (0.84, 0.99) 0.0326  |
| PA level                                |                           |                           |                           |
| 0                                       | 1(Reference)              | 1(Reference)              | 1(Reference)              |
| 10min-1h                                | 0.60 (0.22, 1.64) 0.3211  | 0.76 (0.27, 2.09) 0.5878  | 0.78 (0.28, 2.16) 0.6356  |
| 1-2.5h                                  | 0.29 (0.13, 0.67) 0.0038  | 0.25 (0.09, 0.70) 0.0083  | 0.26 (0.09, 0.73) 0.0100  |
| 2.5-5h                                  | 0.56 (0.28, 1.11) 0.0968  | 0.68 (0.32, 1.45) 0.3182  | 0.70 (0.33, 1.50) 0.3635  |
| 5-7.5h                                  | 0.35 (0.13, 0.96) 0.0408  | 0.47 (0.17, 1.32) 0.1531  | 0.49 (0.17, 1.35) 0.1669  |
| 7.5-13.3h                               | 0.33 (0.10, 1.05) 0.0609  | 0.31 (0.08, 1.30) 0.1093  | 0.32 (0.08, 1.32) 0.1151  |
| 13.3-24h                                | 0.52 (0.16, 1.64) 0.2608  | 0.42 (0.10, 1.72) 0.2272  | 0.42 (0.10, 1.74) 0.2323  |
| P for trend                             | 0.012                     | 0.03                      | 0.033                     |
| <b>Cardiovascular disease mortality</b> |                           |                           |                           |
| PA(Continuous)                          | 0.97 (0.93, 1.00) 0.0372  | 0.95 (0.91, 0.99) 0.0121  | 0.95 (0.91, 0.99) 0.0138  |
| PA level                                |                           |                           |                           |
| 0                                       | 1(Reference)              | 1(Reference)              | 1(Reference)              |
| 10min-1h                                | 1.13 (0.68, 1.85) 0.6419  | 1.28 (0.76, 2.14) 0.3580  | 1.20 (0.71, 2.03) 0.4904  |
| 1-2.5h                                  | 0.79 (0.55, 1.12) 0.1871  | 0.78 (0.52, 1.15) 0.2073  | 0.78 (0.52, 1.16) 0.2195  |
| 2.5-5h                                  | 0.79 (0.53, 1.17) 0.2328  | 0.75 (0.48, 1.18) 0.2115  | 0.72 (0.46, 1.13) 0.1523  |
| 5-7.5h                                  | 0.93 (0.61, 1.43) 0.7563  | 0.84 (0.52, 1.36) 0.4725  | 0.86 (0.53, 1.40) 0.5504  |
| 7.5-13.3h                               | 0.72 (0.42, 1.22) 0.2239  | 0.59 (0.31, 1.14) 0.1144  | 0.59 (0.31, 1.13) 0.1128  |
| 13.3-24h                                | 0.52 (0.25, 1.12) 0.0947  | 0.44 (0.18, 1.07) 0.0709  | 0.44 (0.18, 1.08) 0.0728  |
| P for trend                             | 0.037                     | 0.012                     | 0.014                     |

Non-adjusted model adjust for: None; Adjust I model adjust for: age, sex, BMI, race, marital status, smoking, alcohol drinking; Adjust II model adjust for: age, sex, BMI, race, marital status, smoking, alcohol drinking, hypertension, coronary heart disease, angina, myocardial infarction, stroke, diabetes, and asthma;.
